# Supplementary material for: Optimal planting pattern of cotton is regulated by irrigation amount under mulch drip irrigation
Source: PubMed Central journal article supplement (PMC10265678; doi:10.3389/fpls.2023.1158329), 2023-05-30

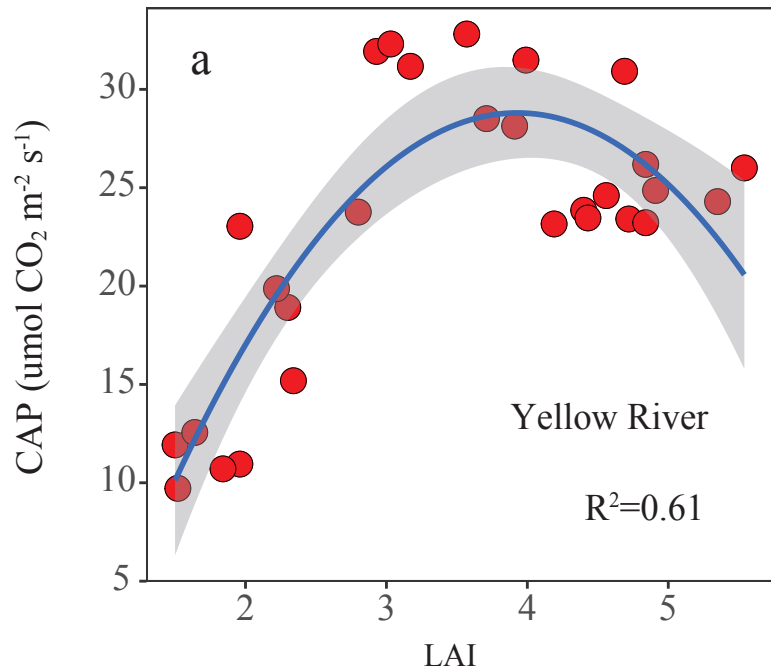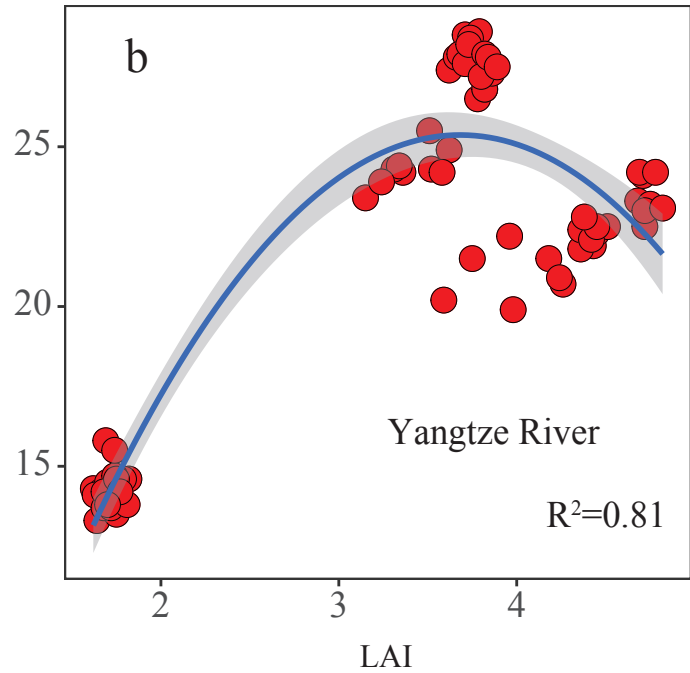

Supplement: Image_1.pdf [file Image_1.pdf]
